# Supplementary material
Source: PubMed Central journal article supplement (PMC3121487)
Supplement: supp_M110.198069_jbc.M110.198069-1.pdf [file supp_M110.198069_jbc.M110.198069-1.pdf]

SUPPLEMENTAL DATA

**Figure Suppl. 1**

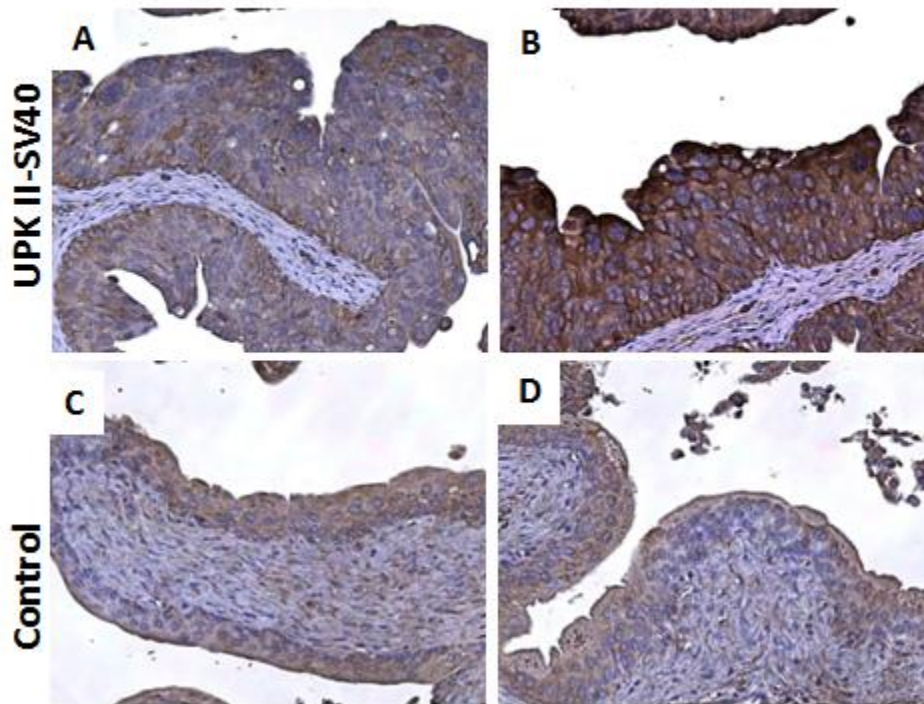

Figure Supplementary 1. Glut-1 expression in UPK II-SV40 bladder carcinoma *in situ*. A-D, immunohistochemistry for Glut-1, a glucose transporter whose expression is related to hypoxia, was performed in bladder tissues from UPK II-SV40 and control mice. Representative images are shown (200x original magnification), exhibiting an increased staining for Glut-1 in urothelial carcinoma *in situ* of UPK II-SV40 mice, with a pattern of staining almost exclusively located in the malignant epithelial cells.

**Figure Suppl. 2**

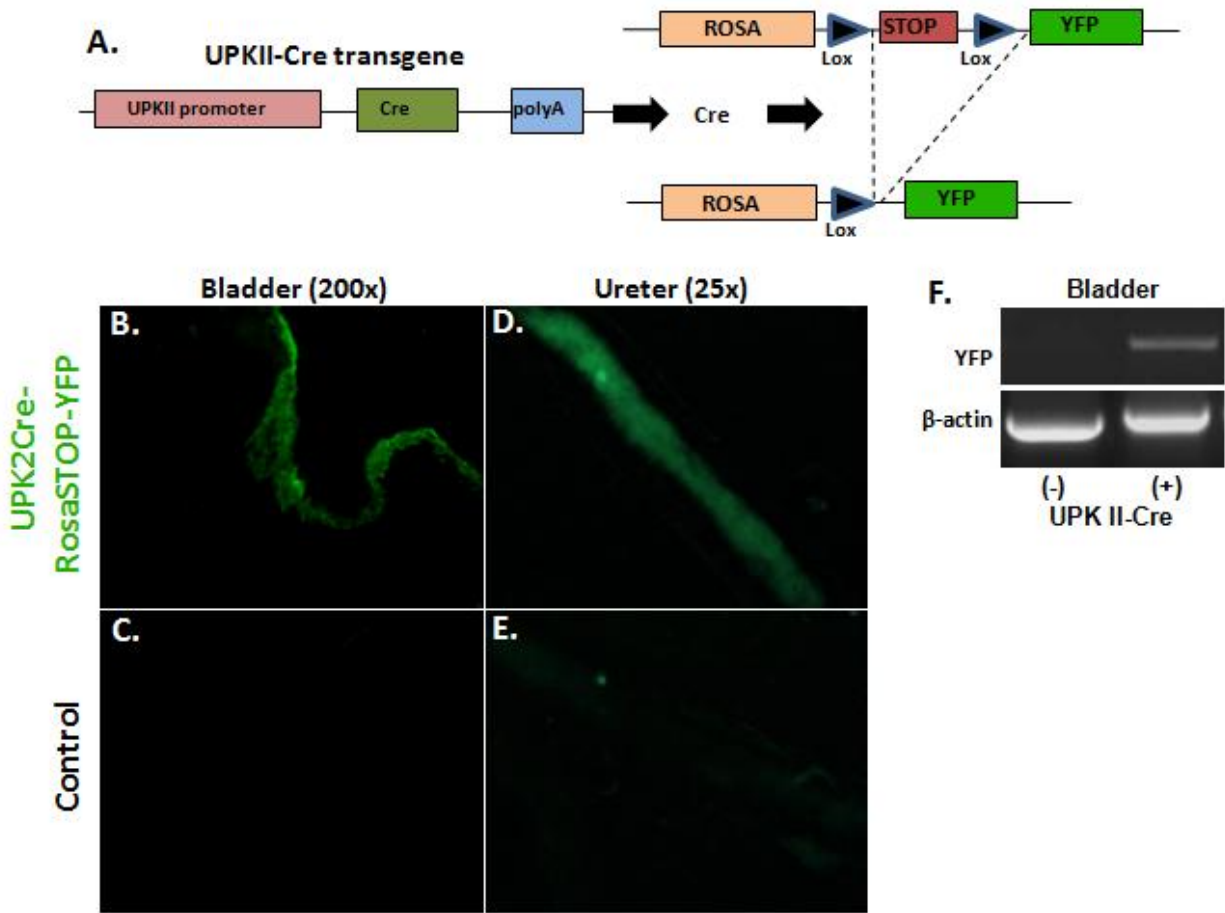

Figure Suppl. 2 . Reporter mouse UPK II-Cre;Rosa-STOP-YFP. A, DNA construct formed by the UPKII promoter and Cre-recombinase; the excision of the STOP cassette by Cre-recombinase generates urothelial-restricted expression of YFP. B-F, fluorescence was found only in bladder (B,C) and ureter (D,E) of UPKII-Cre;Rosa-STOP-YFP(+/+) reporter mice, but not in controls. F, PCR for recombinant UPKII-YFP was only positive in UPKII-Cre;Rosa-STOP-YFP(+/+) bladder.

**Supplementary table 1.** PCR primers used for cDNA synthesis and amplification of miRNA.

| <b>miRNA</b>          | <b>Sequence</b>                                     | <b>Stem-loop primer</b>                                        | <b>Forward primer (5'→3')</b>                     |
|-----------------------|-----------------------------------------------------|----------------------------------------------------------------|---------------------------------------------------|
| RNU6B                 | CUGC GCAAGGAUGACACGCAA AU<br>UCGUGAAGCGUCCAU AUUUUU | GTCGTATCCAGTGCAGGGTC<br>CGAGGTATTCGCACTGGATA<br>CGACAAAAATATGG | TGCGGCTGCGCAAGGATGA                               |
| miR-17                | CAAAGUGCUUACAGUGCAGGUAG                             | GTCGTATCCAGTGCAGGGTC<br>CGAGGTATTCGCACTGGATA<br>CGACCTACCTGC   | TGCGGCAAAGTGCTTACAGT                              |
| miR-18a               | UAAGGUGCAUCUAGUGCAGAUAG                             | GTCGTATCCAGTGCAGGGTC<br>CGAGGTATTCGCACTGGATA<br>CGACCTATCTGC   | TGCGGTAAGGTGCATCTAGT                              |
| miR-19a               | UGUGCAA AU CUAUGCAA AACUGA                          | GTCGTATCCAGTGCAGGGTC<br>CGAGGTATTCGCACTGGATA<br>CGACTCAGTTTT   | TGCGGTGTGCAAATCTATGC                              |
| miR-20a               | UAAAGUGCUU AUAGUGCAGGUAG                            | GTCGTATCCAGTGCAGGGTC<br>CGAGGTATTCGCACTGGATA<br>CGACCTACCTGC   | TGCGGTAAAGTGCTTATAGT                              |
| miR-92a               | UAUUGCACUUGUCCCGGCCUG                               | GTCGTATCCAGTGCAGGGTC<br>CGAGGTATTCGCACTGGATA<br>CGACCAGGCCGG   | TGCGGTATTGCACTTGTC                                |
| miR-21                | UAGCUUAUCAGACUGAUGUUGA                              | GTCGTATCCAGTGCAGGGTC<br>CGAGGTATTCGCACTGGATA<br>CGACTCAACATC   | TGCGGTAGCTTATCAGACT                               |
| miR-205               | UCCUUCAU UCCACCGGAGUCUG                             | GTCGTATCCAGTGCAGGGTC<br>CGAGGTATTCGCACTGGATA<br>CGACCAGACTCC   | TGCGGTCCTTCATTCCACC                               |
| miR-222               | AGCUACAUCUGGCUACUGGGU                               | GTCGTATCCAGTGCAGGGTC<br>CGAGGTATTCGCACTGGATA<br>CGACACCCAGTA   | TGCGGAGCTACATCTGGC                                |
| miR-129-5p            | CUUUUUGCGGUCUGGGCUUGC                               | GTCGTATCCAGTGCAGGGTC<br>CGAGGTATTCGCACTGGATA<br>CGACGCAAGCCC   | TGCGGCTTTTTGCGGTCT                                |
| miR-34a               | UGGCAGUGUCU UAGCUGGUUGU                             | GTCGTATCCAGTGCAGGGTC<br>CGAGGTATTCGCACTGGATA<br>CGACACAACCAG   | TGCGGTGGCAGTGTCTTAG                               |
| miR-145               | GUCCAGUUU UCCCAGGAAUCCCU                            | GTCGTATCCAGTGCAGGGTCCG<br>AGGTATTCGCACTGGATACGAC<br>AGGGATTC   | TGCGGTGAGATGAAGCACT                               |
| <b>Common reverse</b> | -----                                               | -----                                                          | <b>Reverse primer (5'→3')</b><br>GTGCAGGGTCCGAGGT |

Supplementary Table 2. Primers for rt RT-PCR

| <b>Gene</b>    | <b>Forward primer (5'→3')</b> | <b>Reverse primer (5'→3')</b> |
|----------------|-------------------------------|-------------------------------|
| VEGF-A         | GGAGATCCTTCGAGGAGCACTT        | GGCGATTTAGCAGCAGATATAAGAA     |
| HIF-1 $\alpha$ | CAGCTTCCTTCGGACACATAAG        | CCACAGCAATGAAACCCTCCA         |
| HIF-1 $\beta$  | GAAATCTATCCCAGCATCAC          | GACCACTATTCCTGAAATTCTC        |
| TSP-1          | ACTGACCGAGGAAGGGTCC           | CCCGCTGTAGCTCTTGTTCA          |
| Dicer          | GGTCCTTTCTTTGGACTGCCA         | GCGATGAACGTCTTCCCTGA          |
| Drosha         | CACTCCA ACTACAAGAGCCA         | ATTGCTTCTTCAA ACTCCGT         |

Supplementary Table 3. Level of expression of angiogenic markers by gender in UPKII-SV40 mice.\*

|                 | <b>Females*</b> | <b>Males*</b> | <b>P**</b> |
|-----------------|-----------------|---------------|------------|
| <b>VEGF</b>     | 2.09            | 2.04          |            |
| <b>TSP-1</b>    | 0.60            | 0.47          | 0.59       |
| <b>HIF1a</b>    | 1.17            | 0.74          | 0.12       |
| <b>HIF-1b</b>   | 1.52            | 1.35          | 0.61       |
| <b>miR-107</b>  | --              | --            | --         |
| <b>miR-18a</b>  | 7.86            | 4.08          | 0.47       |
| <b>miR-19a</b>  | 5.54            | 3.18          | 0.36       |
| <b>miR-20</b>   | 1.81            | 1.28          | 0.58       |
| <b>miR-17</b>   | 3.01            | 1.93          | 0.41       |
| <b>miR-92</b>   | ---             | ---           | ---        |
| <b>miR-34</b>   | 1.10            | 0.73          | 0.315      |
| <b>miR-21</b>   | 0.91            | 0.47          | 0.21       |
| <b>miR-205</b>  | 0.57            | 0.38          | 0.25       |
| <b>miR-222</b>  | 0.46            | 0.30          | 0.41       |
| <b>miR-145</b>  | 0.21            | 0.21          | 0.95       |
| <b>miR-200c</b> | 1.05            | 0.77          | 0.49       |

\* Levels of expression are related to the reference control group (normalized to 1).

\*\* U-Mann Whitney test for comparison of means.
